# Supplementary material
Source: PubMed Central journal article supplement (PMC6760658)
Supplement: NIHMS1525353-supplement-Supplementary_Document__Final_Version_.pdf [file NIHMS1525353-supplement-Supplementary_Document__Final_Version_.pdf]

# Supplementary Information for Adaptive Zone Model Predictive Control of Artificial Pancreas Based on Glucose- and Velocity-Dependent Control Penalties

Dawei Shi, Eyal Dassau, Francis J. Doyle III\*

This document provides supplementary information for the manuscript “Adaptive Zone Model Predictive Control of Artificial Pancreas Based on Glucose- and Velocity-Dependent Control Penalties,” submitted for publication in IEEE Transactions on Biomedical Engineering. In Section I, we review the zone MPC algorithm with velocity-weighting and velocity-penalty developed in [1], based on which the adaptive zone MPC approach described in the manuscript is developed. The implementation details of the developed parameter adaptation approach are presented in Section II.

## I. ZONE MODEL PREDICTIVE CONTROL

In [1], a periodic zone MPC with velocity-weighting and velocity-penalty is developed for the artificial pancreas to achieve safe and satisfactory closed-loop blood glucose regulation for patients with T1DM. Driven by the arrival of glucose measurements, the controller runs in discrete time and calculates a numeric control law every 5 minutes. Specifically, at discrete time instant  $i$ , the control law of the zone MPC with velocity-weighting and velocity-penalty is obtained by solving a constrained optimization problem of the following form:

$$\mathbf{u}_{0:N_u-1}^* := \arg \min_{\mathbf{u}_{0:N_u-1}} J(x_i, \mathbf{u}_{0:N_u-1}) \quad (1)$$

subject to

$$\mathbf{x}_0 := x_i \quad (2.1)$$

$$\mathbf{x}_{k+1} := A\mathbf{x}_k + B\mathbf{u}_k \quad \forall k \in \mathbb{Z}_{0:N_p-1} \quad (2.2)$$

$$\mathbf{y}_k := C_y \mathbf{x}_k \quad \forall k \in \mathbb{Z}_{0:N_p} \quad (2.3)$$

$$\mathbf{v}_k := C_v \mathbf{x}_k \quad \forall k \in \mathbb{Z}_{0:N_p} \quad (2.4)$$

$$\mathbf{u}_k \leq \hat{\xi}_{i+k} \quad \forall k \in \mathbb{Z}_{0:N_u-1} \quad (2.5)$$

$$\mathbf{u}_k \geq \check{\xi}_{i+k} \quad \forall k \in \mathbb{Z}_{0:N_u-1} \quad (2.6)$$

$$\mathbf{u}_k = 0 \quad \forall k \in \mathbb{Z}_{N_u:N_p-1} \quad (2.7)$$

$$\mathbf{z}_k := Z(y_k, i+k) \quad \forall k \in \mathbb{Z}_{0:N_p} \quad (2.8)$$

$$\hat{\mathbf{z}}_k := \max(\mathbf{z}_k, 0) \quad \forall k \in \mathbb{Z}_{0:N_p} \quad (2.9)$$

$$\check{\mathbf{z}}_k := \min(\mathbf{z}_k, 0) \quad \forall k \in \mathbb{Z}_{0:N_p} \quad (2.10)$$

This work was supported by the National Institutes of Health under Grants DP3DK104057 and UC4DK108483. (Corresponding author: Francis J. Doyle III.)

The authors are with Harvard John A. Paulson School of Engineering and Applied Sciences, Harvard University, Cambridge, MA 02138, USA. Emails: {daweishi, dassau, frank\_doyle}@seas.harvard.edu

$$\hat{u}_k := \max(u_k, 0) \quad \forall k \in \mathbb{Z}_{0:N_u-1} \quad (2.11)$$

$$\check{u}_k := \min(u_k, 0) \quad \forall k \in \mathbb{Z}_{0:N_u-1} \quad (2.12)$$

$$\hat{v}_k := \max(v_k, 0) \quad \forall k \in \mathbb{Z}_{0:N_p} \quad (2.13)$$

$$\hat{D} := \begin{cases} D > 0 & \text{if } y_0 + y_s \in \mathbb{D} \\ 0 & \text{otherwise.} \end{cases} \quad (2.14)$$

In eq. (1), the cost function  $J(\cdot, \cdot)$  is defined as

$$J(\cdot, \cdot) := \sum_{k=1}^{N_p} \left( \check{z}_k^2 + Q(v_k) \hat{z}_k^2 + \hat{D} \hat{v}_k^2 \right) + \sum_{k=0}^{N_u-1} \left( \hat{R} \hat{u}_k^2 + \check{R} \check{u}_k^2 \right), \quad (3)$$

where  $v_k$ ,  $\hat{z}_k$ ,  $\check{z}_k$ ,  $\hat{u}_k$ ,  $\check{u}_k$  and  $\hat{v}_k$  are respectively defined in (2.4), (2.9), (2.10), (2.11), (2.12) and (2.13); in particular,  $\hat{z}_k$ ,  $\check{z}_k$  are determined on the basis of a diurnal zone-excursion function  $Z(y, i)$  (see (2.8) for an illustration) defined by

$$Z(y, i) := \arg \min_{\alpha \in \mathbb{R}} \left\{ \alpha^2 \left| y - \alpha \in [\check{\zeta}_i, \hat{\zeta}_i] \right. \right\},$$

with  $[\check{\zeta}_i, \hat{\zeta}_i]$  representing the diurnal glucose target zone (see Fig. 1).  $Q(v_k)$  denotes a velocity-dependent weighting matrix [2] satisfying

$$Q(v) := \begin{cases} 1 & \text{if } v \geq 0 \\ \epsilon & \text{if } v \leq 1 \\ \frac{1}{2} [\cos(v\pi)(1 - \epsilon) + (1 + \epsilon)] & \text{otherwise.} \end{cases} \quad (4)$$

An illustration of  $Q(v)$  is provided in Fig. 2. Parameter  $\hat{D}$  in (3) determines a glucose-dependent cost on glucose velocity, which is defined in (2.14) with  $\mathbb{D} := [140, 180]$  and  $D := 1000$ . The prediction horizon and control horizon in the MPC are set to  $N_p := 9$  and  $N_u := 5$ , which correspond to 45 and 25 minutes, respectively. The control input weighting parameters in [1] are set to  $\hat{R} := 6500$  and  $\check{R} := 100$ , respectively. The state space model in (2.2)-(2.4) is parameterized by

$$A := \begin{bmatrix} p_1 + 2p_2 & -2p_1p_2 - p_2^2 & p_1p_2^2 \\ 1 & 0 & 0 \\ 0 & 1 & 0 \end{bmatrix},$$

$$B := \frac{1800K}{u_{\text{TDI}}} [1 \ 0 \ 0]^\top,$$

$$C_y := [0 \ 0 \ 1],$$

$$C_v := [0.1 \ 0 \ -0.1],$$

$$K := 90(p_1 - 1)(p_2 - 1)^2, \quad p_1 := 0.98, \quad p_2 := 0.965,$$

where  $u_{\text{TDI}}$  denotes the subject-specific total daily insulin;  $\hat{\xi}_{i+k}$  and  $\check{\xi}_{i+k}$  in (2.5)-(2.6) denote the upper and lower bounds on the control input  $u_k$ ; we refer the interested reader to [3], [4] for more details about the model. The detailed description of this MPC algorithm can be found in [1].

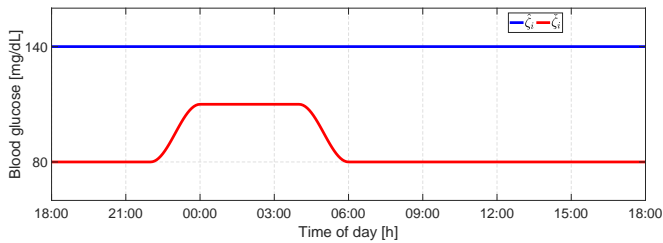

Fig. 1: An illustration of the upper and lower bounds  $\hat{\zeta}_i$  and  $\check{\zeta}_i$  of diurnal BG target zone (reproduced from Fig. A.1 in [1]).

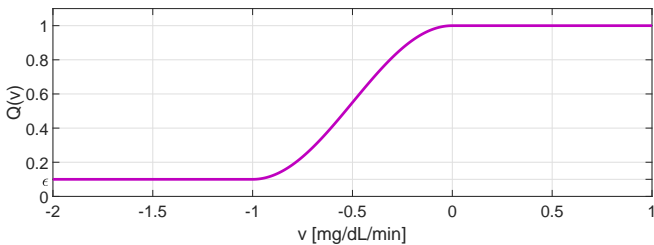

Fig. 2: An illustration of velocity-weighting function  $Q(v)$  (reproduced from Fig. 1 in [1]).

We note that  $u_k$  in the MPC optimization problem denotes the relative correction of insulin infusion  $u_{\text{abs},k}$  from the basal rate  $u_{\text{basal}}$ , namely,  $u_k := u_{\text{abs},k} - u_{\text{basal}}$ . As the amount of insulin infusion is non-negative, it holds that  $\check{\xi}_{i+k} \geq -u_{\text{basal}}$  and  $u_k \geq -u_{\text{basal}}$ . By definition,  $\hat{u}_k$  and  $\check{u}_k$  indicate delivery rates above and below the basal rate  $u_{\text{basal}}$ , respectively; thus the separate weighting parameters  $\hat{R}$  and  $\check{R}$  on  $\hat{u}_k$  and  $\check{u}_k$  allows independent penalization of the costs of insulin delivery above and below basal rate.

## II. IMPLEMENTATION DETAILS

In terms of implementation, the proposed adaptive MPC method basically replaces the original cost function in (3) with

$$J(\cdot, \cdot) := \sum_{k=1}^{N_p} \left( \hat{z}_k^2 + Q(v_k) \hat{z}_k^2 + \hat{D} \hat{v}_k^2 \right) + \sum_{k=0}^{N_u-1} \left( \hat{R}(\mu_k, y_k) \hat{u}_k^2 + \check{R}(\mu_k, y_k) \check{u}_k^2 \right), \quad (5)$$

which adds to the non-convexity of the MPC optimization problem. To ensure the convergence of the optimization algorithm and speed up the computation, a heuristic technique is introduced to implement the proposed adaptive MPC based on the physiological properties of the insulin-glucose metabolic process. To aid the description, we use the notation  $\{\cdot\}_i$  to denote a data sequence obtained by the zone MPC at controller update time instant  $i$  (e.g.,  $\{y_k : k \in \mathbb{Z}_{0:N_u-1}\}_i$ ). The motivating observation is that a lag of 10–30 minutes exists between the plasma insulin concentrations and the effect of insulin [5]. As the control horizon  $N_u$  is equal to 5 and the sampling time is 5 minutes, the predictions  $\{y_k : k \in \mathbb{Z}_{0:N_u-1}\}_i$  and  $\{\mu_k : k \in \mathbb{Z}_{0:N_u-1}\}_i$  are dominated by the historical glucose measurements at time instant  $i$  rather than the optimal inputs  $\{u_k^*\}_i$ , which was also observed in [6]. In this regard, we estimate  $\{y_k : k \in \mathbb{Z}_{0:N_u-1}\}_i$  and  $\{\mu_k : k \in \mathbb{Z}_{0:N_u-1}\}_i$  with  $\{y_k : k \in \mathbb{Z}_{1:N_u}\}_{i-1}$  and  $\{y_k - y_{k-1} : k \in \mathbb{Z}_{1:N_u}\}_{i-1}$ ,

respectively, and calculate  $\{\hat{R}(\mu_k, y_k) : k \in \mathbb{Z}_{0:N_u-1}\}_i$  and  $\{\check{R}(y_k) : k \in \mathbb{Z}_{0:N_u-1}\}_i$  based on the obtained estimates for  $\{y_k : k \in \mathbb{Z}_{0:N_u-1}\}_i$  and  $\{\mu_k : k \in \mathbb{Z}_{0:N_u-1}\}_i$ . An important property of these estimates is that they can be calculated before solving the MPC optimization problem formed by (1), (5) and (2) at time instant  $i$  and are constant during the solution procedure of the optimization problem. In this way, the resultant structure of constrained optimization problem remains unchanged compared with that in [2], [6] and thus the optimization problem can be solved following the same procedure proposed in Section 3 of [6].

Note that the glucose velocity sequence  $\{\mu_k\}$  we adopt in this work is different from  $\{v_k\}$  defined according to (2.4), which was proposed to quantify the velocity weighting and velocity penalties in [1]. By definition,  $\{\mu_k\}$  provides a closer approximation of the velocity sequence of the noiseless glucose prediction  $\{y_k\}$ . Another major consideration here, however, is to avoid introducing  $\{\mu_k\}$ -induced disturbances to the convergence of the  $\{v_k\}$ -driven sequential optimization procedure utilized to solve non-convex MPC optimization problem (see Section 3 in [6] for details). In particular, during the sequential optimization procedure, the sequence  $\{v_k\}$  is updated in each iteration until the convergence conditions are satisfied. As the estimates for  $\{\mu_k\}$  remain constant and do not change with  $\{v_k\}$  throughout this procedure, the adopted  $\{\mu_k\}$  sequence does not affect the convergence of the sequential optimization algorithm.

## REFERENCES

- [1] R. Gondhalekar *et al.*, “Velocity-weighting & velocity-penalty MPC of an artificial pancreas: Improved safety & performance,” *Automatica*, vol. 91, pp. 105–117, 2018.
- [2] —, “Velocity-weighting to prevent controller-induced hypoglycemia in mpc of an artificial pancreas to treat T1DM,” in *2015 American Control Conf.*, July 2015, pp. 1635–1640.
- [3] K. van Heusden *et al.*, “Control-relevant models for glucose control using a priori patient characteristics,” *IEEE Transactions on Biomedical Engineering*, vol. 59, no. 7, pp. 1839–1849, 2012.
- [4] R. Gondhalekar *et al.*, “Periodic zone-MPC with asymmetric costs for outpatient-ready safety of an artificial pancreas to treat type 1 diabetes,” *Automatica*, vol. 71, pp. 237–246, 2016.
- [5] A. Haidar, “The artificial pancreas: How closed-loop control is revolutionizing diabetes,” *IEEE Control Systems*, vol. 36, no. 5, pp. 28–47, Oct 2016.
- [6] R. Gondhalekar *et al.*, “Tackling problem nonlinearities & delays via asymmetric, state-dependent objective costs in mpc of an artificial pancreas,” in *5th IFAC Conference on Nonlinear Model Predictive Control*, 2015, pp. 154–159.
